# Supplementary material for: Comercio, cambio climático y sostenibilidad
Source: JCI journal article supplement (doi:10.1172/jci.insight.166869), 2009-01-01
Supplement: sd1 [file 1]

## Supplementary Figure 1

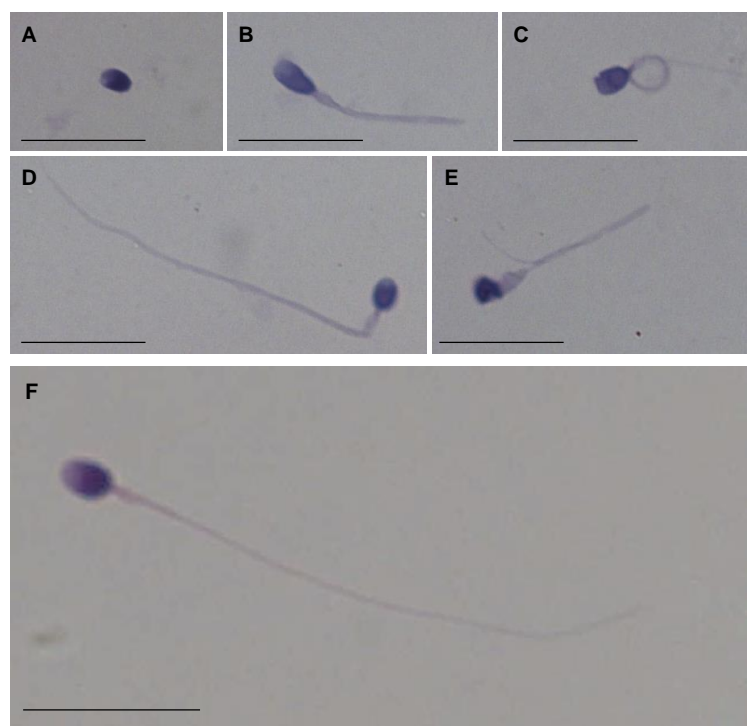

**Supplementary Figure 1. Sperm morphology of P7 and a fertile control.** (A-E) Representative images showing spermatozoa with absent (A), short (B), coiled (C) and bent (D) flagella and flagella of irregular caliber (E) from P7 and spermatozoa with normal flagella (F) from a fertile control. Scale bars represent 10  $\mu\text{m}$ .

Supplementary Figure 2

A

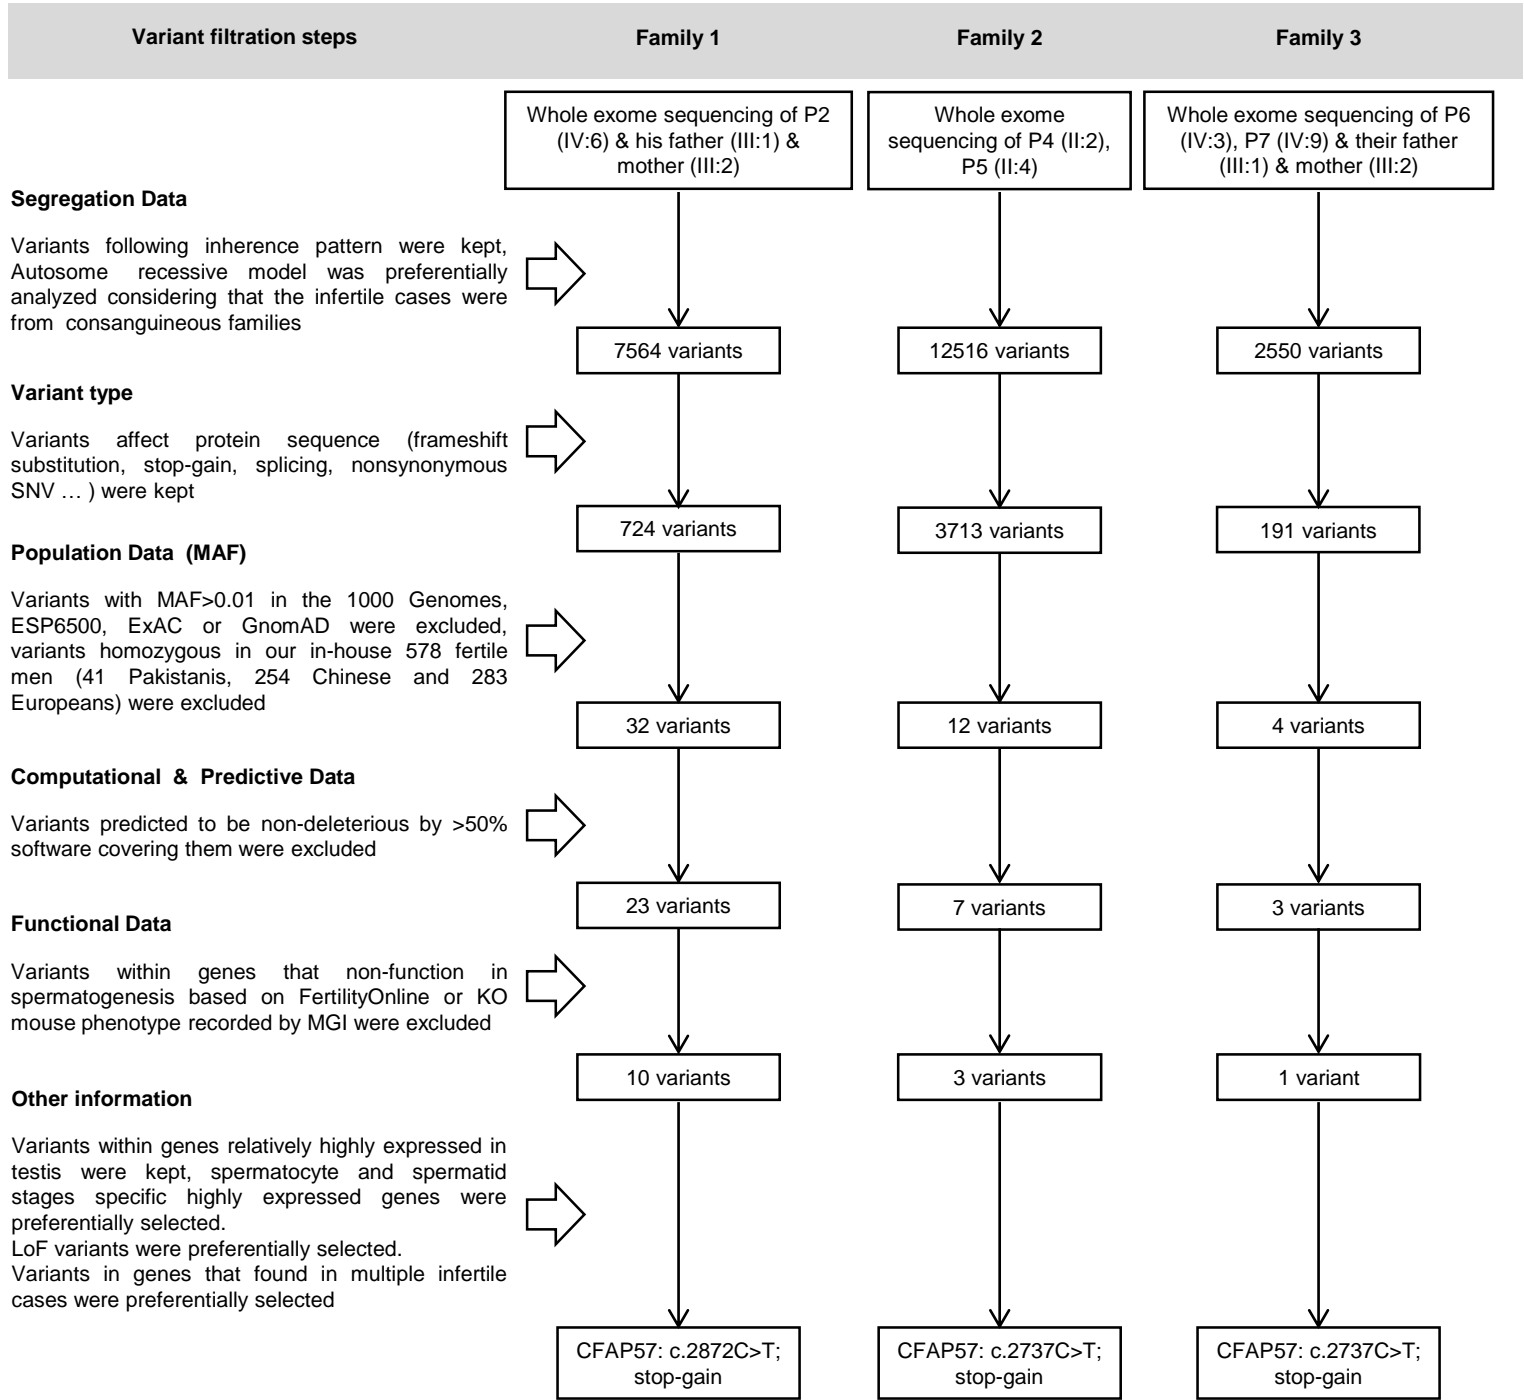

B

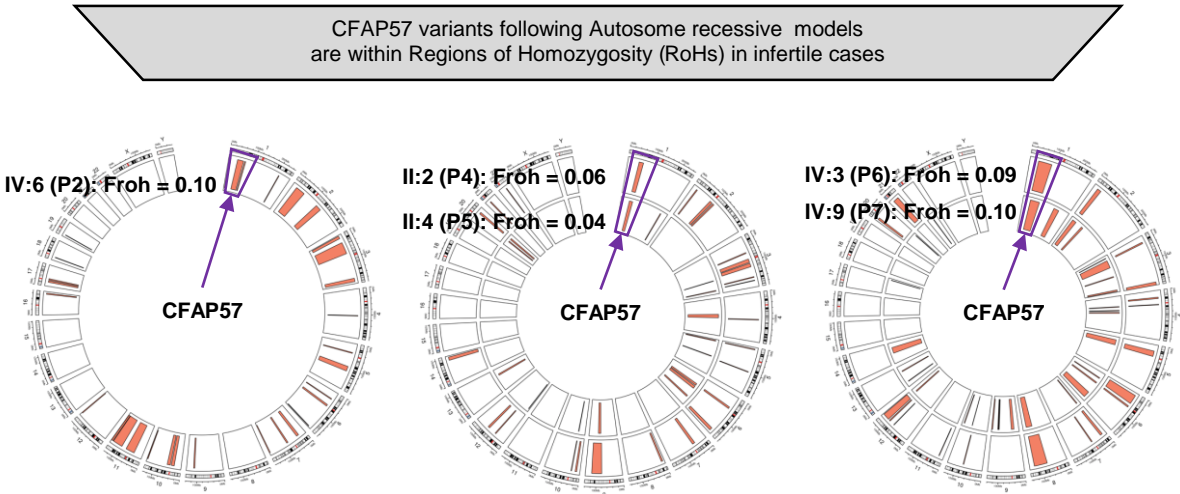

Supplementary Figure 2. Bioinformatic analysis of candidate variants. (A) Candidate pathogenic variants were filtered.

(B) CFAP57 variants are within RoHs in infertile cases.

**A**

H-CFAP57-short

H-CFAP57-long

H-CFAP57-short

**B**

**CFAP57-F/R1****CFAP57-F/R2**

**ACTB-F/R**

# E

***Cfap57*-F/R1**

**Cfap57-F/R2**

***Actb*-F/R**

H

1 10 20 30 40 50 60 70 80 90 100 110 120 130

Human House  
Consensus

131 140 150 160 170 180 190 200 210 220 230 240 250 260

Human House  
Consensus

261 270 280 290 300 310 320 330 340 350 360 370 380 390

Human House  
Consensus

391 400 410 420 430 440 450 460 470 480 490 500 510 520

Human House  
Consensus

521 530 540 550 560 570 580 590 600 610 620 630 640 650

Human House  
Consensus

651 660 670 680 690 700 710 720 730 740 750 760 770 780

Human House  
Consensus

781 790 800 810 820 830 840 850 860 870 880 890 900 910

Human House  
Consensus

911 920 930 940 950 960 970 980 990 1000 1010 1020 1030 1040

Human House  
Consensus

1041 1050 1060 1070 1080 1090 1100 1110 1120 1130 1140 1150 1160 1170

Human House  
Consensus

1171 1180 1190 1200 1210 1220 1230 1240 1250

Human House  
Consensus

**Supplementary Figure 3. Two transcripts of *CFAP57/Cfap57* are both expressed in testes and HNE cells/ mice trachea.** (A) Schematic illustrating two transcriptions of *CFAP57*. (B-D) PAGE and Sanger sequencing results showing the expression of both *CFAP57* transcriptions in testes and HNE cells. (E-G) PAGE and Sanger sequencing results showing the expression of both *Cfap57* transcriptions in testes and trachea. (H) *CFAP57* was conserved in human and mice. Sequence alignment shows conservation of human and mice *CFAP57* protein. Red letters represent completely same sequence. The alignment was performed using the online software MultAlin (<http://multalin.toulouse.inra.fr/multalin/multalin.html>).

Supplementary Figure 4

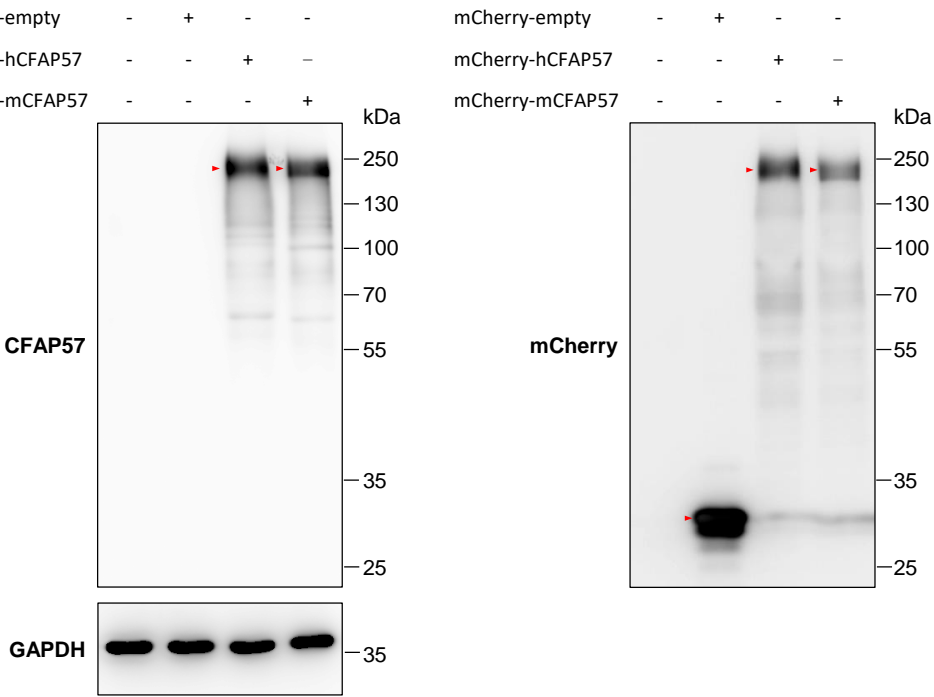

**Supplementary Figure 4. Anti-CFAP57 antibody was able to recognize both human and mice CFAP57 *in vitro*.** MCherry-tagged human and mice CFAP57 and mCherry were expressed in cultured HEK293T cells. Both anti-mCherry antibodies and anti-CFAP57 antibodies were used to detect the mCherry-tagged CFAP57. Arrows indicate the positions of bands corresponding to proteins of interest.

Supplementary Figure 5

A

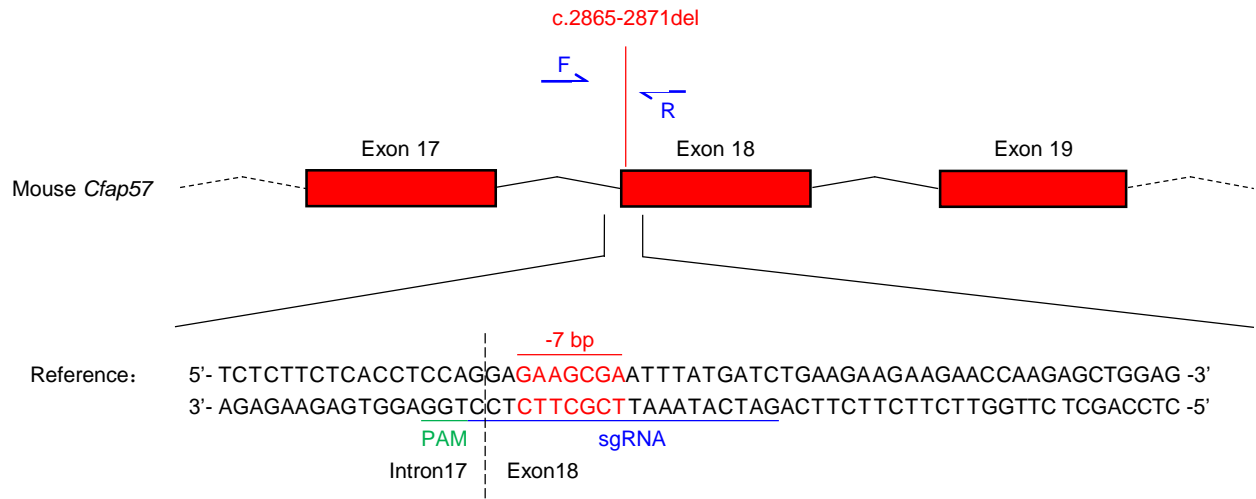

B

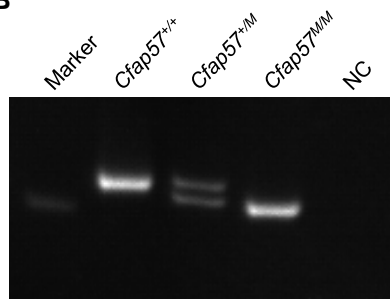

C

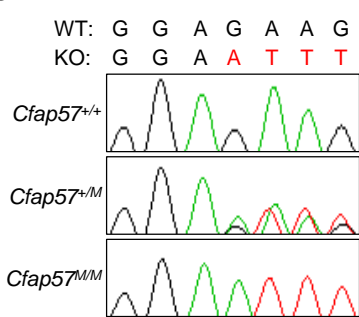

**Supplementary Figure 5. *Cfap57* mutant mice were generated by CRISPR/Cas9. (A)** Schematic illustrating construction of the mouse model (*Cfap57<sup>MM</sup>*). **(B)** PAGE results showing the 7 bp deletion in *Cfap57<sup>MM</sup>* mice. **(C)** Sanger sequencing results of *Cfap57<sup>+/+</sup>*, *Cfap57<sup>+M</sup>* and *Cfap57<sup>MM</sup>* mice.

Supplementary Figure 6

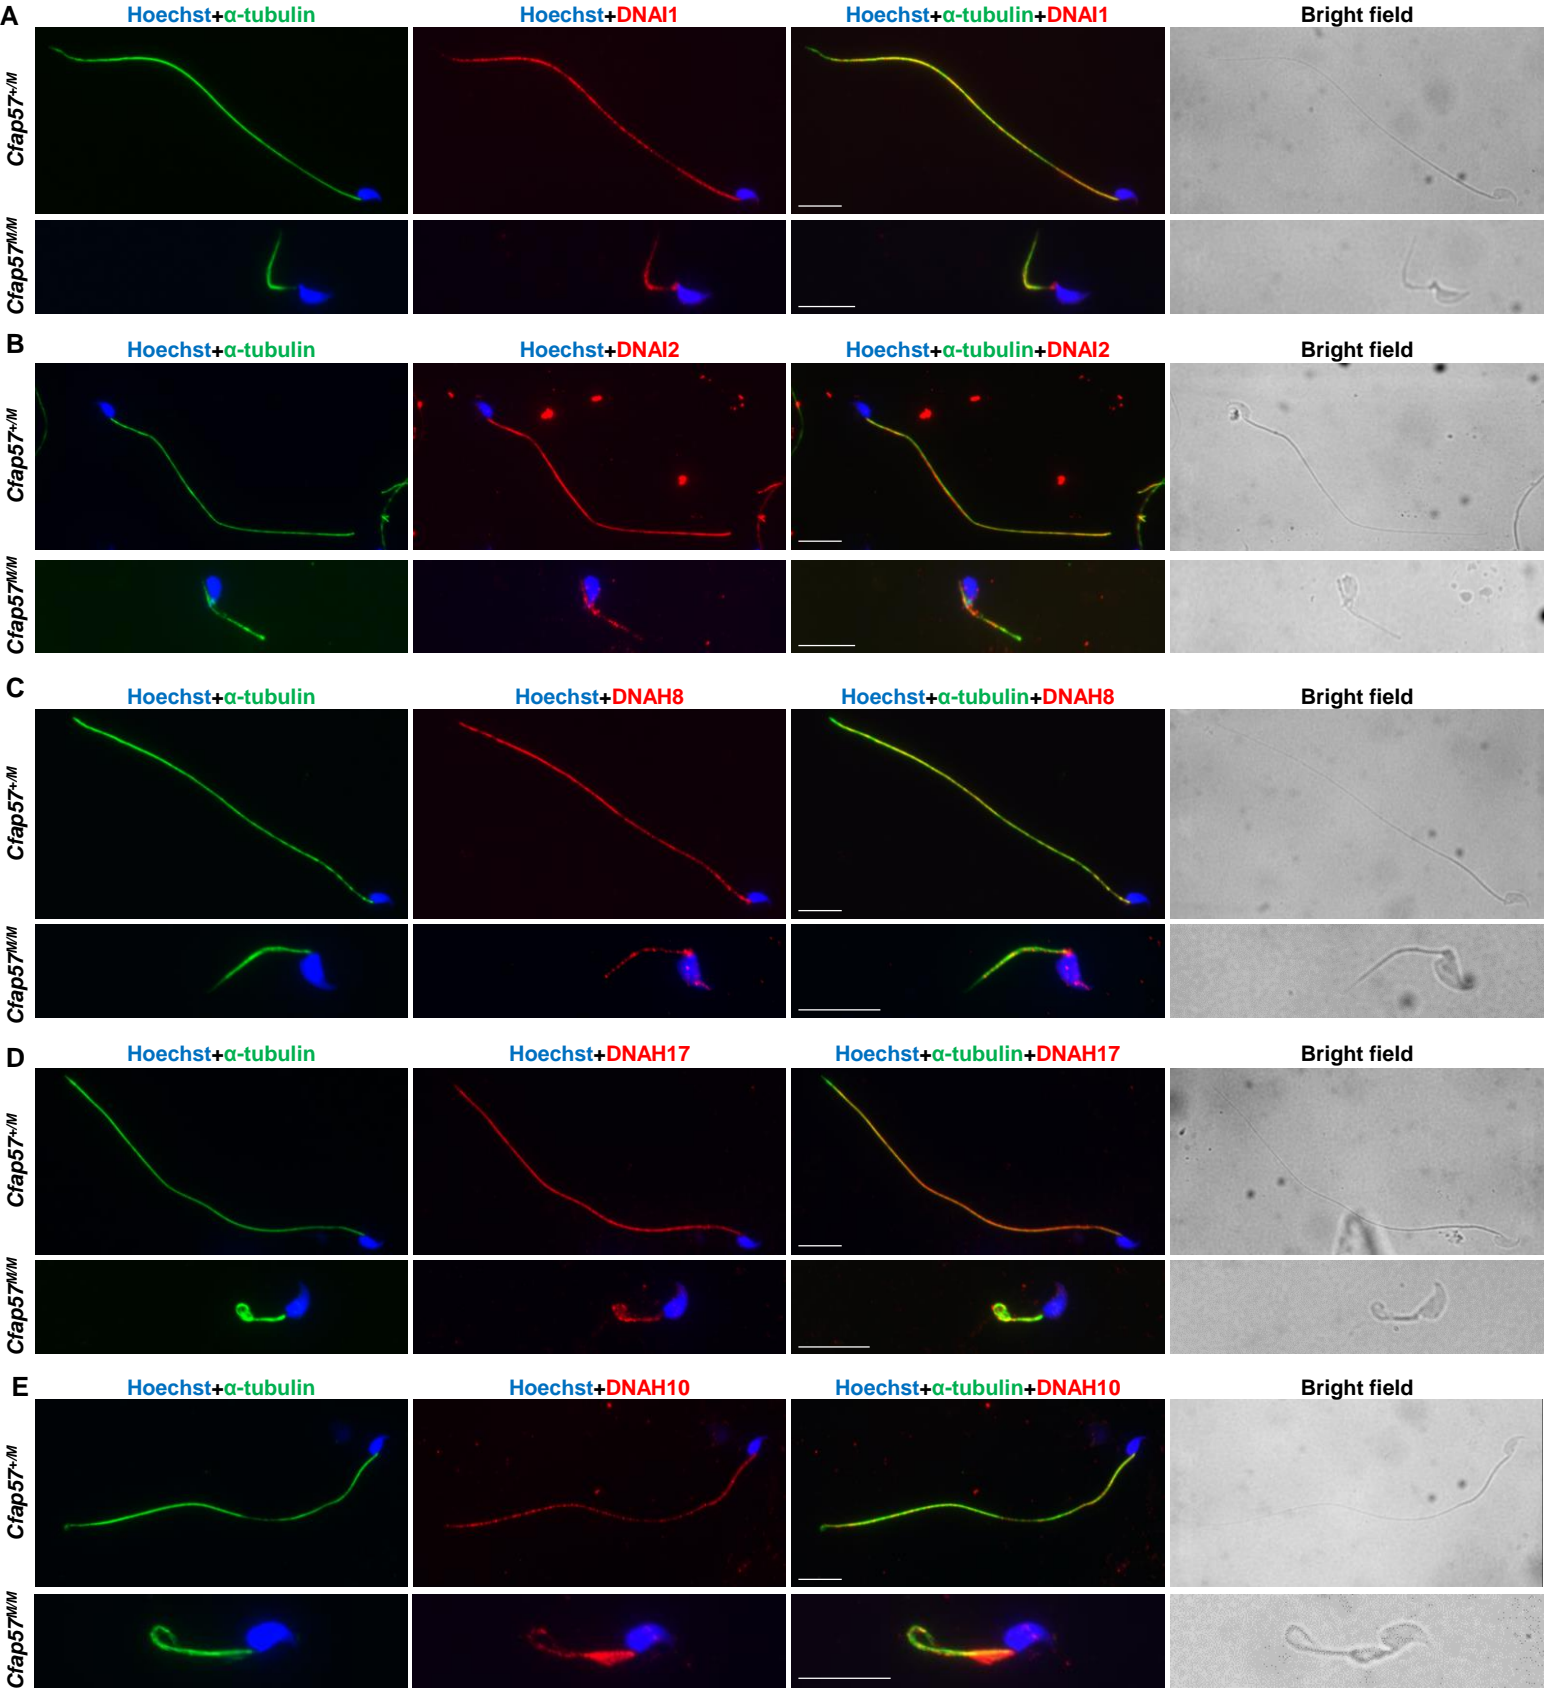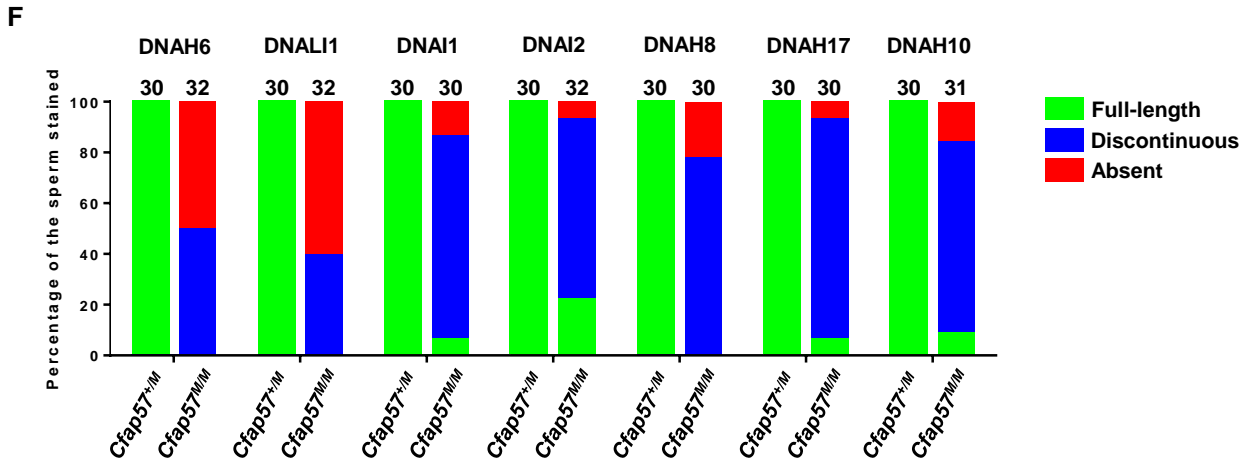

**Supplementary Figure 6. ODA and double-headed IDA proteins still exist but show abnormal signals in sperm from *Cfap57<sup>MM</sup>* mice.** (A-E) Representative images of spermatozoa from *Cfap57<sup>+M</sup>* and *Cfap57<sup>MM</sup>* mice co-stained with anti- $\alpha$ -Tubulin and anti-DNAI1 antibodies (A), anti-DNAI2 antibodies (B), anti-DNAH8 antibodies (C), anti-DNAH17 antibodies (D), or anti-DNAH10 antibodies (E). Scale bars represent 10  $\mu$ m. (F) Percentage of spermatozoa with full-length, discontinuous or absolutely absent signals of the stained antibodies. At least 30 sperm were analyzed after stained for each antibody.



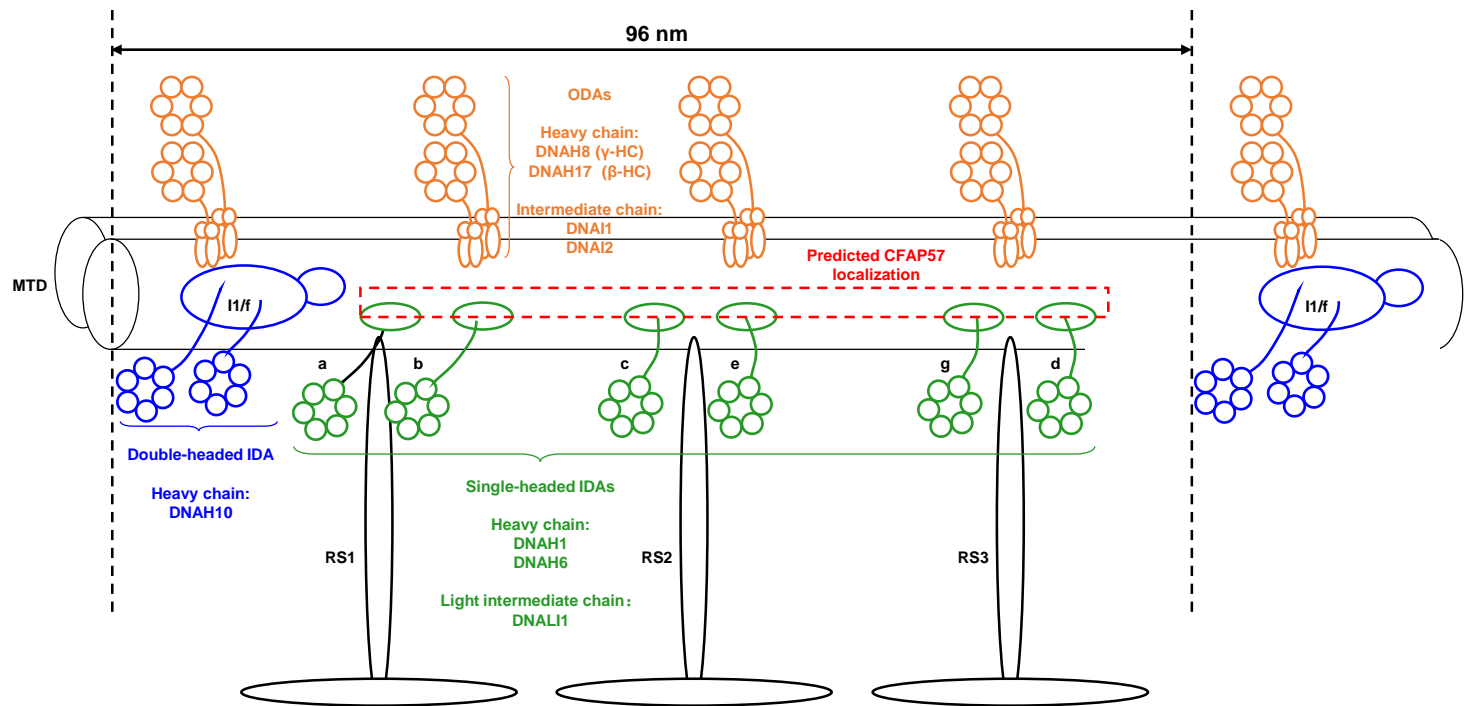

**Supplementary Figure 7. Diagram for the localizations of proteins used as ODA/IDA markers.** ODAs are drawn in orange, double-headed IDAs are drawn in blue and the single-headed IDAs are drawn in green. The red rectangle represents the predicted localization of CFAP57, which is connected to a subset of single-headed IDAs but not double-headed IDAs or ODAs.

IDA, inner dynein arm. ODA, outer dynein arm. MTD, microtubules doublet. RS, radial spoke.
